# Supplementary material for: Oral Microbiome of Deep and Shallow Dental Pockets In Chronic Periodontitis
Source: PLoS One. 2013 Jun 6;8(6):e65520. doi: 10.1371/journal.pone.0065520 (PMC3675156; doi:10.1371/journal.pone.0065520)
Supplement: Table S1 — Demographic Distribution of the subjects. The subject numbers, means and standard deviation (Std Dev) of age and smoke-pack years for location, gender and race were summarized. VCU, Virginia Commonwealth University; Wise, Wise, Virginia MOM project; F, female; M, male; AA, African American; CA, Caucasian. (XLSX) [file pone.0065520.s002.xlsx]

## Sheet: Table S1
Table S1. Demographic Distribution of the subjects
			Age			Smoke Pk Yrs
Location	Gender	Race	N	Mean	Std Dev	Mean	Std Dev
VCU	F	AA	8	50.8	8.8	1.9	5.3
		CA	8	51.4	10.1	13.4	17.2
	M	AA	3	58	19.2	0.3	0.6
		CA	6	43.5	13.6	14.3	14.7
Wise	F	CA	20	49	10.6	16.5	20.9
	M	CA	43	46	7.5	31	31.8
VCU: Virginia Commonwealth University
Wise: Wise, Virginia MOM project.
AA : African American
CA: Caucasian
