# Supplementary material for: Oral Microbiome of Deep and Shallow Dental Pockets In Chronic Periodontitis
Source: PLoS One. 2013 Jun 6;8(6):e65520. doi: 10.1371/journal.pone.0065520 (PMC3675156; doi:10.1371/journal.pone.0065520)
Supplement: Table S2 — Primer sequences and barcodes for 16S rRNA pyrosequencing. The primer 16S_F515 contains the reverse primer sequence for the GS FLX Titanium ‘Primer A’ and 16S rRNAs forward primer sequence (OM_515F). Each reverse primer is composed of the forward primer sequence for the GS FLX Titanium ‘Primer A’, a barcode sequence and 16S rRNAs reverse primer sequence (OM_1061R). (XLSX) [file pone.0065520.s003.xlsx]

## Sheet: Table S2
Table S2. The primer sequences and barcodes for 16s rRNA pyrosequening
Primer name	Sequence	Barcode
16S_F515	CCTATCCCCTGTGTGCCTTGGCAGTCTCAGGTGCCAGCAGCCGCGGTAA
16S_R1080_1	CCATCTCATCCCTGCGTGTCTCCGACTCAGACACGTTCACRRCACGAGCTGWCGAC	ACACGT
16S_R1080_2	CCATCTCATCCCTGCGTGTCTCCGACTCAGACAGTGTCACRRCACGAGCTGWCGAC	ACAGTG
16S_R1080_3	CCATCTCATCCCTGCGTGTCTCCGACTCAGACGATCTCACRRCACGAGCTGWCGAC	ACGATC
16S_R1080_4	CCATCTCATCCCTGCGTGTCTCCGACTCAGACTACGTCACRRCACGAGCTGWCGAC	ACTACG
16S_R1080_5	CCATCTCATCCCTGCGTGTCTCCGACTCAGACTCTGTCACRRCACGAGCTGWCGAC	ACTCTG
16S_R1080_6	CCATCTCATCCCTGCGTGTCTCCGACTCAGAGACGTTCACRRCACGAGCTGWCGAC	AGACGT
16S_R1080_7	CCATCTCATCCCTGCGTGTCTCCGACTCAGAGATGCTCACRRCACGAGCTGWCGAC	AGATGC
16S_R1080_8	CCATCTCATCCCTGCGTGTCTCCGACTCAGAGCTCTTCACRRCACGAGCTGWCGAC	AGCTCT
16S_R1080_9	CCATCTCATCCCTGCGTGTCTCCGACTCAGAGTCACTCACRRCACGAGCTGWCGAC	AGTCAC
16S_R1080_10	CCATCTCATCCCTGCGTGTCTCCGACTCAGAGTGCATCACRRCACGAGCTGWCGAC	AGTGCA
16S_R1080_11	CCATCTCATCCCTGCGTGTCTCCGACTCAGATCGACTCACRRCACGAGCTGWCGAC	ATCGAC
16S_R1080_12	CCATCTCATCCCTGCGTGTCTCCGACTCAGATGACGTCACRRCACGAGCTGWCGAC	ATGACG
16S_R1080_13	CCATCTCATCCCTGCGTGTCTCCGACTCAGATGTCGTCACRRCACGAGCTGWCGAC	ATGTCG
16S_R1080_14	CCATCTCATCCCTGCGTGTCTCCGACTCAGCACGTATCACRRCACGAGCTGWCGAC	CACGTA
16S_R1080_15	CCATCTCATCCCTGCGTGTCTCCGACTCAGCAGATCTCACRRCACGAGCTGWCGAC	CAGATC
16S_R1080_16	CCATCTCATCCCTGCGTGTCTCCGACTCAGCAGTCATCACRRCACGAGCTGWCGAC	CAGTCA
16S_R1080_17	CCATCTCATCCCTGCGTGTCTCCGACTCAGCATCAGTCACRRCACGAGCTGWCGAC	CATCAG
16S_R1080_18	CCATCTCATCCCTGCGTGTCTCCGACTCAGCATGCATCACRRCACGAGCTGWCGAC	CATGCA
16S_R1080_19	CCATCTCATCCCTGCGTGTCTCCGACTCAGCGATACTCACRRCACGAGCTGWCGAC	CGATAC
16S_R1080_20	CCATCTCATCCCTGCGTGTCTCCGACTCAGCGTAGTTCACRRCACGAGCTGWCGAC	CGTAGT
16S_R1080_21	CCATCTCATCCCTGCGTGTCTCCGACTCAGCGTGATTCACRRCACGAGCTGWCGAC	CGTGAT
16S_R1080_22	CCATCTCATCCCTGCGTGTCTCCGACTCAGCTAGACTCACRRCACGAGCTGWCGAC	CTAGAC
16S_R1080_23	CCATCTCATCCCTGCGTGTCTCCGACTCAGCTATGCTCACRRCACGAGCTGWCGAC	CTATGC
16S_R1080_24	CCATCTCATCCCTGCGTGTCTCCGACTCAGCTCGTATCACRRCACGAGCTGWCGAC	CTCGTA
16S_R1080_25	CCATCTCATCCCTGCGTGTCTCCGACTCAGCTGAGTTCACRRCACGAGCTGWCGAC	CTGAGT
16S_R1080_26	CCATCTCATCCCTGCGTGTCTCCGACTCAGCTGTACTCACRRCACGAGCTGWCGAC	CTGTAC
16S_R1080_27	CCATCTCATCCCTGCGTGTCTCCGACTCAGGACGATTCACRRCACGAGCTGWCGAC	GACGAT
16S_R1080_28	CCATCTCATCCCTGCGTGTCTCCGACTCAGGACTGTTCACRRCACGAGCTGWCGAC	GACTGT
16S_R1080_29	CCATCTCATCCCTGCGTGTCTCCGACTCAGGAGCTATCACRRCACGAGCTGWCGAC	GAGCTA
16S_R1080_30	CCATCTCATCCCTGCGTGTCTCCGACTCAGGATAGCTCACRRCACGAGCTGWCGAC	GATAGC
16S_R1080_31	CCATCTCATCCCTGCGTGTCTCCGACTCAGGATGACTCACRRCACGAGCTGWCGAC	GATGAC
16S_R1080_32	CCATCTCATCCCTGCGTGTCTCCGACTCAGGCACTATCACRRCACGAGCTGWCGAC	GCACTA
16S_R1080_33	CCATCTCATCCCTGCGTGTCTCCGACTCAGGCATAGTCACRRCACGAGCTGWCGAC	GCATAG
16S_R1080_34	CCATCTCATCCCTGCGTGTCTCCGACTCAGGCTATCTCACRRCACGAGCTGWCGAC	GCTATC
16S_R1080_35	CCATCTCATCCCTGCGTGTCTCCGACTCAGGCTGTATCACRRCACGAGCTGWCGAC	GCTGTA
16S_R1080_36	CCATCTCATCCCTGCGTGTCTCCGACTCAGGTAGACTCACRRCACGAGCTGWCGAC	GTAGAC
16S_R1080_37	CCATCTCATCCCTGCGTGTCTCCGACTCAGGTCACTTCACRRCACGAGCTGWCGAC	GTCACT
16S_R1080_38	CCATCTCATCCCTGCGTGTCTCCGACTCAGGTCGTATCACRRCACGAGCTGWCGAC	GTCGTA
16S_R1080_39	CCATCTCATCCCTGCGTGTCTCCGACTCAGGTGATCTCACRRCACGAGCTGWCGAC	GTGATC
16S_R1080_40	CCATCTCATCCCTGCGTGTCTCCGACTCAGGTGTCATCACRRCACGAGCTGWCGAC	GTGTCA
16S_R1080_41	CCATCTCATCCCTGCGTGTCTCCGACTCAGTACGTGTCACRRCACGAGCTGWCGAC	TACGTG
16S_R1080_42	CCATCTCATCCCTGCGTGTCTCCGACTCAGTAGCACTCACRRCACGAGCTGWCGAC	TAGCAC
16S_R1080_43	CCATCTCATCCCTGCGTGTCTCCGACTCAGTCACAGTCACRRCACGAGCTGWCGAC	TCACAG
16S_R1080_44	CCATCTCATCCCTGCGTGTCTCCGACTCAGTCAGTCTCACRRCACGAGCTGWCGAC	TCAGTC
16S_R1080_45	CCATCTCATCCCTGCGTGTCTCCGACTCAGTCGAGTTCACRRCACGAGCTGWCGAC	TCGAGT
16S_R1080_46	CCATCTCATCCCTGCGTGTCTCCGACTCAGTCTACGTCACRRCACGAGCTGWCGAC	TCTACG
16S_R1080_47	CCATCTCATCCCTGCGTGTCTCCGACTCAGTCTGACTCACRRCACGAGCTGWCGAC	TCTGAC
16S_R1080_48	CCATCTCATCCCTGCGTGTCTCCGACTCAGTGACTGTCACRRCACGAGCTGWCGAC	TGACTG
16S_R1080_49	CCATCTCATCCCTGCGTGTCTCCGACTCAGACAGCTTCACRRCACGAGCTGWCGAC	ACAGCT
16S_R1080_50	CCATCTCATCCCTGCGTGTCTCCGACTCAGACATGCTCACRRCACGAGCTGWCGAC	ACATGC
16S_R1080_51	CCATCTCATCCCTGCGTGTCTCCGACTCAGACGTCATCACRRCACGAGCTGWCGAC	ACGTCA
16S_R1080_52	CCATCTCATCCCTGCGTGTCTCCGACTCAGACTCAGTCACRRCACGAGCTGWCGAC	ACTCAG
16S_R1080_53	CCATCTCATCCCTGCGTGTCTCCGACTCAGACTGCATCACRRCACGAGCTGWCGAC	ACTGCA
16S_R1080_54	CCATCTCATCCCTGCGTGTCTCCGACTCAGAGAGCTTCACRRCACGAGCTGWCGAC	AGAGCT
16S_R1080_55	CCATCTCATCCCTGCGTGTCTCCGACTCAGAGCATGTCACRRCACGAGCTGWCGAC	AGCATG
16S_R1080_56	CCATCTCATCCCTGCGTGTCTCCGACTCAGAGTACGTCACRRCACGAGCTGWCGAC	AGTACG
16S_R1080_57	CCATCTCATCCCTGCGTGTCTCCGACTCAGAGTCTCTCACRRCACGAGCTGWCGAC	AGTCTC
16S_R1080_58	CCATCTCATCCCTGCGTGTCTCCGACTCAGATCACGTCACRRCACGAGCTGWCGAC	ATCACG
16S_R1080_59	CCATCTCATCCCTGCGTGTCTCCGACTCAGATCTCGTCACRRCACGAGCTGWCGAC	ATCTCG
16S_R1080_60	CCATCTCATCCCTGCGTGTCTCCGACTCAGATGCACTCACRRCACGAGCTGWCGAC	ATGCAC
16S_R1080_61	CCATCTCATCCCTGCGTGTCTCCGACTCAGCACATGTCACRRCACGAGCTGWCGAC	CACATG
16S_R1080_62	CCATCTCATCCCTGCGTGTCTCCGACTCAGCACTGATCACRRCACGAGCTGWCGAC	CACTGA
16S_R1080_63	CCATCTCATCCCTGCGTGTCTCCGACTCAGCAGCTATCACRRCACGAGCTGWCGAC	CAGCTA
16S_R1080_64	CCATCTCATCCCTGCGTGTCTCCGACTCAGCATACGTCACRRCACGAGCTGWCGAC	CATACG
16S_R1080_65	CCATCTCATCCCTGCGTGTCTCCGACTCAGCATCTGTCACRRCACGAGCTGWCGAC	CATCTG
16S_R1080_66	CCATCTCATCCCTGCGTGTCTCCGACTCAGCGACATTCACRRCACGAGCTGWCGAC	CGACAT
16S_R1080_67	CCATCTCATCCCTGCGTGTCTCCGACTCAGCGATGTTCACRRCACGAGCTGWCGAC	CGATGT
16S_R1080_68	CCATCTCATCCCTGCGTGTCTCCGACTCAGCGTCATTCACRRCACGAGCTGWCGAC	CGTCAT
16S_R1080_69	CCATCTCATCCCTGCGTGTCTCCGACTCAGCTACAGTCACRRCACGAGCTGWCGAC	CTACAG
16S_R1080_70	CCATCTCATCCCTGCGTGTCTCCGACTCAGCTAGTCTCACRRCACGAGCTGWCGAC	CTAGTC
16S_R1080_71	CCATCTCATCCCTGCGTGTCTCCGACTCAGCTCATGTCACRRCACGAGCTGWCGAC	CTCATG
16S_R1080_72	CCATCTCATCCCTGCGTGTCTCCGACTCAGCTCTGATCACRRCACGAGCTGWCGAC	CTCTGA
16S_R1080_73	CCATCTCATCCCTGCGTGTCTCCGACTCAGCTGCATTCACRRCACGAGCTGWCGAC	CTGCAT
16S_R1080_74	CCATCTCATCCCTGCGTGTCTCCGACTCAGGACACTTCACRRCACGAGCTGWCGAC	GACACT
16S_R1080_75	CCATCTCATCCCTGCGTGTCTCCGACTCAGGACTACTCACRRCACGAGCTGWCGAC	GACTAC
16S_R1080_76	CCATCTCATCCCTGCGTGTCTCCGACTCAGGAGATCTCACRRCACGAGCTGWCGAC	GAGATC
16S_R1080_77	CCATCTCATCCCTGCGTGTCTCCGACTCAGGAGTCATCACRRCACGAGCTGWCGAC	GAGTCA
16S_R1080_78	CCATCTCATCCCTGCGTGTCTCCGACTCAGGATCGATCACRRCACGAGCTGWCGAC	GATCGA
16S_R1080_79	CCATCTCATCCCTGCGTGTCTCCGACTCAGGATGTCTCACRRCACGAGCTGWCGAC	GATGTC
16S_R1080_80	CCATCTCATCCCTGCGTGTCTCCGACTCAGGCAGTATCACRRCACGAGCTGWCGAC	GCAGTA
16S_R1080_81	CCATCTCATCCCTGCGTGTCTCCGACTCAGGCATGATCACRRCACGAGCTGWCGAC	GCATGA
16S_R1080_82	CCATCTCATCCCTGCGTGTCTCCGACTCAGGCTCTATCACRRCACGAGCTGWCGAC	GCTCTA
16S_R1080_83	CCATCTCATCCCTGCGTGTCTCCGACTCAGGTACGTTCACRRCACGAGCTGWCGAC	GTACGT
16S_R1080_84	CCATCTCATCCCTGCGTGTCTCCGACTCAGGTATCGTCACRRCACGAGCTGWCGAC	GTATCG
16S_R1080_85	CCATCTCATCCCTGCGTGTCTCCGACTCAGGTCATCTCACRRCACGAGCTGWCGAC	GTCATC
16S_R1080_86	CCATCTCATCCCTGCGTGTCTCCGACTCAGGTCTCATCACRRCACGAGCTGWCGAC	GTCTCA
16S_R1080_87	CCATCTCATCCCTGCGTGTCTCCGACTCAGGTGCTATCACRRCACGAGCTGWCGAC	GTGCTA
16S_R1080_88	CCATCTCATCCCTGCGTGTCTCCGACTCAGTACAGCTCACRRCACGAGCTGWCGAC	TACAGC
16S_R1080_89	CCATCTCATCCCTGCGTGTCTCCGACTCAGTACTGCTCACRRCACGAGCTGWCGAC	TACTGC
16S_R1080_90	CCATCTCATCCCTGCGTGTCTCCGACTCAGTAGTCGTCACRRCACGAGCTGWCGAC	TAGTCG
16S_R1080_91	CCATCTCATCCCTGCGTGTCTCCGACTCAGTCAGACTCACRRCACGAGCTGWCGAC	TCAGAC
16S_R1080_92	CCATCTCATCCCTGCGTGTCTCCGACTCAGTCATGCTCACRRCACGAGCTGWCGAC	TCATGC
16S_R1080_93	CCATCTCATCCCTGCGTGTCTCCGACTCAGTCGTACTCACRRCACGAGCTGWCGAC	TCGTAC
16S_R1080_94	CCATCTCATCCCTGCGTGTCTCCGACTCAGTCTCAGTCACRRCACGAGCTGWCGAC	TCTCAG
16S_R1080_95	CCATCTCATCCCTGCGTGTCTCCGACTCAGTGACACTCACRRCACGAGCTGWCGAC	TGACAC
16S_R1080_96	CCATCTCATCCCTGCGTGTCTCCGACTCAGTGAGCATCACRRCACGAGCTGWCGAC	TGAGCA
