# Supplementary material for: Oral Microbiome of Deep and Shallow Dental Pockets In Chronic Periodontitis
Source: PLoS One. 2013 Jun 6;8(6):e65520. doi: 10.1371/journal.pone.0065520 (PMC3675156; doi:10.1371/journal.pone.0065520)
Supplement: Table S5 — Comparison of species-level microbiome between shallow and deep pockets. The species-level OTUs between shallow and deep pockets were statistically analyzed by using a two-part model and false discovery rate (FDR). The p-values for species between deep and shallow sites yielded from the two-part model were performed on multiple comparisons by FDR. The q-value of FDR <0.05 represented significant difference in microbial abundances between the shallow and deep sites. The species with significant difference between the shallow and deep sites were shown. SD_shallow, standard deviation of shallow; SD_Deep, standard deviation of Deep; Change, difference between Deep and Shallow. (XLSX) [file pone.0065520.s006.xlsx]

## Sheet: Table S5
Table S5. Comparison of species-level microbiome between shallow and deep pockets.
Species	Shallow	SD_shallow	Deep	SD_Deep	q-value	Change
Porphyromonas gingivalis	0.0185622	0.0669376	0.0617976	0.122057	0.00349253	0.0432354
Fusobacterium nucleatum subsp. vincentii	0.0181765	0.0282951	0.0309351	0.0352549	0.000790667	0.0127585
Prevotella denticola	0.0132261	0.0351524	0.0222871	0.0346246	0.0118938	0.00906099
Prevotella intermedia	0.0043599	0.0122653	0.0132376	0.0306612	0.0134912	0.00887767
Fusobacterium nucleatum subsp. animalis	0.015748	0.0210823	0.024182	0.0280151	0.00382304	0.00843398
Prevotella nigrescens	0.011737	0.0205725	0.0198511	0.0295044	0.0141304	0.00811413
Aggregatibacter actinomycetemcomitans	0.000596966	0.00302429	0.00792162	0.07416	0.00702839	0.00732466
Porphyromonas endodontalis	0.00407699	0.00994344	0.011304	0.0203945	0.000777847	0.00722706
Treponema denticola	0.003251	0.00840058	0.00863024	0.0136992	0.000542189	0.00537924
Tannerella forsythia	0.00449941	0.00968307	0.00987711	0.0156053	0.000482681	0.0053777
Porphyromonas sp. oral taxon B47	0.00208866	0.00880987	0.00683544	0.0115637	0.00120183	0.00474678
Prevotella sp. oral taxon 526	0.000576614	0.00209465	0.00422116	0.00965998	0.00229876	0.00364455
Lactobacillus salivarius	0.00182467	0.00945104	0.00544491	0.0233832	0.0406085	0.00362024
Parvimonas micra	0.00503586	0.00921823	0.00787328	0.00956067	0.00658334	0.00283742
Atopobium rimae	0.00206125	0.0043254	0.00471091	0.0114864	0.00792254	0.00264966
Filifactor alocis	0.00252578	0.00569612	0.00505606	0.00808002	0.000577236	0.00253027
Treponema medium	0.00240241	0.00551361	0.00487082	0.00769344	0.00349253	0.00246841
Selenomonas sputigena	0.00472022	0.0070005	0.00716492	0.0092033	0.0321669	0.0024447
Bacteroidetes[G-2] sp. oral taxon 274	0.00530292	0.0115574	0.00762276	0.0141831	0.0044547	0.00231984
Bacteroidetes[G-1](Prevotella) sp. oral taxon 272	0.0007275	0.00231788	0.00295406	0.00638825	5.80473e-06	0.00222656
Peptostreptococcaceae[XI][G] sp. oral taxon D17	0.00164501	0.00373288	0.00379548	0.00636363	0.00689715	0.00215047
Prevotella multiformis	0.00118993	0.00592515	0.00323755	0.010101	0.0256935	0.00204761
Prevotella oralis	0.00114202	0.00222344	0.00312458	0.00528157	0.0120888	0.00198256
Streptococcus constellatus	0.00331394	0.0083209	0.00528524	0.0109606	0.00800718	0.0019713
Anaeroglobus geminatus	0.0013463	0.00341633	0.00325259	0.00568096	0.00792254	0.0019063
Dialister invisus	0.0019268	0.0027863	0.00370336	0.00507009	0.00251662	0.00177657
Treponema sp. oral taxon 769	0.00207452	0.00438745	0.00346888	0.00431889	7.69956e-05	0.00139435
Synergistetes[G-3] sp. oral taxon 452	0.00103905	0.00295332	0.00233651	0.006414	0.0038236	0.00129747
Pseudoramibacter alactolyticus	0.00144422	0.00410499	0.00264732	0.00464893	0.000482681	0.0012031
Prevotella pleuritidis[NV]	0.00248672	0.00673548	0.00367532	0.00734742	0.0417487	0.0011886
Veillonellaceae[G-1] sp. oral taxon 150	0.000643864	0.00130604	0.0017951	0.00450817	0.00412474	0.00115124
Selenomonas sp. oral taxon 149	0.000494477	0.00148383	0.00157625	0.00796473	0.00300406	0.00108177
Selenomonas sp. oral taxon 134	0.00088242	0.00268866	0.00187095	0.00296362	0.000777847	0.000988534
Synergistetes[G-3] sp. oral taxon 363	0.00168451	0.00470644	0.00265075	0.00380894	0.000567038	0.000966239
Eubacterium[XI][G-5] saphenum	0.00188761	0.00598394	0.00284758	0.00585609	0.0225334	0.000959966
Synergistetes[G-3] sp. oral taxon 362	0.000966659	0.00336374	0.00192516	0.00371473	0.00113097	0.0009585
Synergistetes[G-3] sp. oral taxon 360	0.00144148	0.00413936	0.00239793	0.00355733	9.34546e-05	0.000956455
Mogibacterium timidum	0.0010284	0.00245011	0.00196878	0.00229399	6.22872e-05	0.000940386
Treponema socranskii subsp. 04	0.00153291	0.00313053	0.00235427	0.00267322	0.00834063	0.000821364
Prevotella buccae	0.000255716	0.00056351	0.00107012	0.00254242	0.00702839	0.000814409
Leptotrichia shahii	0.00433503	0.0103895	0.00512926	0.0129659	0.0313595	0.000794227
Streptococcus sp. oral taxon A95	0.00392562	0.0076171	0.00468973	0.00625439	0.0137448	0.000764102
Prevotella baroniae	0.000292159	0.000942622	0.00104707	0.001932	6.22872e-05	0.000754909
Eubacterium[11][G-6] nodatum	0.000562023	0.00131861	0.00126424	0.00217524	0.000790667	0.000702216
Prevotella sp. oral taxon 782	0.00049583	0.00215531	0.00118197	0.00233181	0.000660433	0.000686136
Dialister sp. oral taxon B63	0.000569511	0.00101253	0.00122105	0.00185492	0.0044547	0.000651534
Tannerella sp. oral taxon 808	0.000270352	0.00055849	0.000898807	0.00193575	0.00657868	0.000628455
Treponema sp. oral taxon 664	0.000858011	0.00219186	0.00148643	0.00228069	0.0038236	0.00062842
Treponema sp. oral taxon 238	0.00045117	0.00163446	0.00107287	0.00440112	0.0021055	0.000621705
Dialister pneumosintes	0.00065758	0.00116466	0.00126067	0.00156931	0.0111946	0.000603091
Fusobacterium sp. oral taxon 203	0.00033717	0.000913858	0.00093892	0.00443233	0.00184935	0.00060175
Prevotella histicola	0.00061625	0.00175387	0.00119418	0.0028745	0.00700308	0.000577932
Mycoplasma faucium	0.00026083	0.000793099	0.000826261	0.00175476	0.000925263	0.000565432
Prevotella sp. oral taxon 443	0.00021425	0.000708507	0.000779159	0.00197294	0.00349253	0.000564909
Prevotella dentalis	0.000340523	0.000940228	0.000882932	0.00200337	0.0236368	0.000542409
Synergistetes[G] sp. oral taxon D48	0.00035142	0.000858701	0.000880477	0.00130458	0.000280464	0.000529057
Johnsonella sp. oral taxon 166	0.000359705	0.00116705	0.000860932	0.0019496	0.0278429	0.000501227
Peptostreptococcaceae[XI][G-4] sp. oral taxon 369	0.000618375	0.00146014	0.00109818	0.00160036	0.00412669	0.000479807
Parvimonas sp. oral taxon 393	0.00167388	0.00442635	0.00215039	0.00396293	0.0372382	0.000476511
Prevotella sp. oral taxon 376	0.000460659	0.00161946	0.000926568	0.00179641	0.0011195	0.000465909
Veillonellaceae[G-1] sp. oral taxon 155	0.00121627	0.00244846	0.00165385	0.00237067	0.0044547	0.00043758
Peptostreptococcaceae[XI][G-3] sp. oral taxon 495	9.0625e-05	0.00041328	0.000498705	0.00199131	0.00113097	0.00040808
Eubacterium[11][G-1] infirmum	0.000148625	0.000549028	0.000547125	0.000972316	9.34546e-05	0.0003985
Prevotella sp. oral taxon 302	0.000467716	0.00106988	0.00085125	0.0010641	0.00800718	0.000383534
Dialister sp. oral taxon A97	0.000297159	0.000499787	0.000669205	0.000949894	0.00352335	0.000372045
Veillonellaceae[G-1] sp. oral taxon 132	0.000255352	0.000540069	0.000626477	0.00148958	0.0112961	0.000371125
Synergistetes[G-3] sp. oral taxon 361	0.000152568	0.00067216	0.000523682	0.00118737	0.00412474	0.000371114
Synergistetes[G-3] sp. oral taxon 453	0.000676591	0.00300531	0.00104724	0.00311126	0.0044547	0.000370648
Desulfobulbus sp. oral taxon 041	0.0005815	0.00156264	0.000950693	0.00185407	0.0027489	0.000369193
Eubacterium[11][G-6] minutum	0.000208989	0.000999117	0.00056942	0.00186199	0.00349253	0.000360432
Treponema socranskii subsp. puccale	0.000445364	0.00120019	0.000792841	0.00150777	0.0466966	0.000347477
Bacteroidetes[G-3] sp. oral taxon 280	0.000274511	0.00102677	0.000615841	0.00128483	0.0118938	0.00034133
Treponema sp. oral taxon 231	0.000698557	0.00158589	0.00103937	0.00154069	0.00574675	0.000340818
Bacteroidetes[G-4] sp. oral taxon 509	3.39773e-06	2.30455e-05	0.000343455	0.00143897	0.0380821	0.000340057
Veillonellaceae[G-1] sp. oral taxon 129	0.000216955	0.000612771	0.00055575	0.0014917	9.34546e-05	0.000338795
Treponema putidum	0.000235602	0.00117264	0.000549602	0.00115099	0.0027986	0.000314
Bacteroidetes[G-3] sp. oral taxon 281	0.000256261	0.00106636	0.000567205	0.00216236	0.0290092	0.000310943
Treponema vincentii	0.000151716	0.000461056	0.000438216	0.000992994	0.0021055	0.0002865
Treponema sp. oral taxon 257	0.00022075	0.000861974	0.000507	0.00128215	0.0209679	0.00028625
Parvimonas sp. oral taxon C15	0.000216693	0.000385143	0.00048608	0.000563746	0.000307209	0.000269386
Lachnospiraceae[G-8] sp. oral taxon 500	0.000456875	0.00168405	0.00072525	0.0015605	0.0118938	0.000268375
Veillonellaceae[G-1] sp. oral taxon 135	0.000117886	0.000329763	0.000381966	0.00106235	0.00349253	0.00026408
Catonella sp. oral taxon 451	4.89773e-05	0.000189593	0.000312602	0.000829229	0.0111946	0.000263625
Mycoplasma salivarium	0.000224909	0.000819563	0.00048558	0.00141528	0.00420062	0.00026067
Slackia exigua	0.000153886	0.000433212	0.000412591	0.00144922	0.00329282	0.000258705
Selenomonas sp. oral taxon 478	0.00037192	0.00072174	0.000628364	0.00138993	0.0147359	0.000256443
Selenomonas sp. oral taxon B30	0.000255182	0.000542147	0.000511136	0.000779359	9.68766e-05	0.000255955
Chloroflexi[G-1] sp. oral taxon 439	0.000207614	0.00074133	0.000452739	0.00104184	0.00154203	0.000245125
Prevotella sp. oral taxon G54	0.000198625	0.000523542	0.000442273	0.00094347	0.0180559	0.000243648
Mitsuokella sp. oral taxon D19	0.000182148	0.00147152	0.000423841	0.00342398	0.0264395	0.000241693
Porphyromonas sp. oral taxon 285	5.95227e-05	0.000194868	0.000286057	0.000756255	0.000307209	0.000226534
Shuttleworthia satelles	0.000218364	0.000665685	0.00044283	0.000907282	0.0203633	0.000224466
Bacteroidetes[G-3] sp. oral taxon 365	0.000353409	0.00177162	0.000575898	0.00126783	0.00302298	0.000222489
Actinomyces oricola	9.65909e-07	9.06103e-06	0.000223409	0.00124364	0.00898862	0.000222443
Eubacterium[XI][G] sp. oral taxon G75	8.42955e-05	0.000229328	0.000306409	0.000513984	0.000665575	0.000222114
Pyramidobacter piscolens	4.30682e-06	2.62001e-05	0.000226239	0.00116867	0.0234932	0.000221932
Treponema sp. oral taxon 268	0.00013542	0.000336913	0.000349432	0.000696482	0.00599531	0.000214011
Dialister sp. oral taxon 119	0.000135	0.000353868	0.000339102	0.000617474	0.000542189	0.000204102
Peptococcus sp. oral taxon 167	0.000409534	0.00112271	0.00061167	0.00108798	0.00317433	0.000202136
Bacteroidetes[G-6] sp. oral taxon 516	1.31136e-05	6.5461e-05	0.00021008	0.000990698	0.0480627	0.000196966
Bulleidia extructa	0.000286148	0.000961177	0.000482159	0.000939399	0.0044547	0.000196011
Mogibacterium pumilum	0.000121114	0.000238836	0.000316795	0.000448203	0.0038236	0.000195682
Veillonellaceae[G-1] sp. oral taxon 145	0.000240023	0.000725484	0.00043442	0.000897965	0.0250674	0.000194398
Prevotella sp. oral taxon 301	0.000142375	0.000336617	0.00033208	0.000524912	0.0207554	0.000189705
Selenomonas sp. oral taxon 143	0.000828205	0.00197564	0.00101475	0.00215501	0.000873651	0.000186545
Prevotella sp. oral taxon 296	0.000180057	0.000446766	0.00036492	0.000725108	0.0100773	0.000184864
Treponema amylovorum	0.000296727	0.0014423	0.000480955	0.00105023	0.0208808	0.000184227
Veillonellaceae[G-1] sp. oral taxon B19	6.61591e-05	0.000185043	0.000245489	0.000489228	0.000984193	0.00017933
Bacteroides heparinolyticus	3.30682e-05	0.000126118	0.000198386	0.000670858	0.000307209	0.000165318
Catonella morbi	0.000915432	0.00242147	0.00108049	0.00190539	0.0462212	0.000165057
Treponema sp. oral taxon G72	4.35e-05	0.000153989	0.000193	0.000438696	0.00663622	0.0001495
Mitsuokella multiacida	6.67841e-05	0.000137108	0.000201977	0.000324082	0.00349253	0.000135193
Prevotella veroralis	0.00770595	0.0220458	0.00784001	0.0151128	0.0253187	0.000134057
Centipeda sp. oral taxon D18	5.52727e-05	0.000152886	0.000184466	0.00048575	0.00532843	0.000129193
Prevotella enoeca	1.34545e-05	7.05245e-05	0.000138989	0.000416934	0.00349253	0.000125534
Treponema sp. oral taxon 490	6.79318e-05	0.000233153	0.000193352	0.00041329	0.00584935	0.00012542
Treponema sp. oral taxon 236	0.00011825	0.000409223	0.000240239	0.000741561	0.0137448	0.000121989
Lachnospiraceae[G-4] sp. oral taxon 373	0.000113966	0.000312105	0.000232545	0.00053825	0.0495841	0.00011858
Peptostreptococcaceae[XI][G-2] sp. oral taxon 091	0.000118568	0.000397067	0.000233784	0.000461681	0.00702839	0.000115216
Treponema socranskii subsp. paredis	9.37386e-05	0.000326514	0.000208136	0.000473583	0.0456813	0.000114398
Selenomonas sp. oral taxon G78	8.15795e-05	0.000221655	0.000191375	0.000379283	0.0134912	0.000109795
Peptostreptococcaceae[XI][G-1] sp. oral taxon 383	2.02841e-05	7.1938e-05	0.000129341	0.000348417	0.00710117	0.000109057
Centipeda periodontii	0.000171125	0.000475273	0.000278091	0.000707436	0.0060567	0.000106966
Peptostreptococcus stomatis	0.000140614	0.000425386	0.000235216	0.00055103	0.0264485	9.46023e-05
Prevotella sp. oral taxon G57	7.08636e-05	0.000178134	0.000165159	0.000371501	0.0106493	9.42955e-05
Olsenella sp. oral taxon 809	2.49091e-05	7.27375e-05	0.000118864	0.000251492	0.0111946	9.39545e-05
Treponema parvum	7.87386e-05	0.000272619	0.000169659	0.000378433	0.00349253	9.09205e-05
Treponema sp. oral taxon G73	6.59773e-05	0.000325634	0.000155193	0.000386722	0.0226568	8.92159e-05
Veillonellaceae[G-1] sp. oral taxon 148	3.31705e-05	9.49536e-05	0.000121432	0.000240988	0.0054629	8.82614e-05
Treponema sp. oral taxon 235	0.000183182	0.000815505	0.000267523	0.000614845	0.00798622	8.43409e-05
Streptococcus sp. oral taxon C08	7.47727e-05	0.000150198	0.000156511	0.00027976	0.0267683	8.17386e-05
Bacteroides sp. oral taxon C69	2.76705e-05	9.79512e-05	0.000102773	0.000208144	0.0128883	7.51023e-05
Mogibacterium diversum	0.000496818	0.00108814	0.000568943	0.000831114	0.00511412	7.2125e-05
Dialister sp. oral taxon C66	3.1375e-05	8.09331e-05	9.77273e-05	0.000257815	0.0137448	6.63523e-05
Oribacterium sp. oral taxon 102	9.30682e-06	4.22411e-05	7.25682e-05	0.000186167	0.0203633	6.32614e-05
Clostridiales[G] sp. oral taxon G74	6.17045e-06	3.30385e-05	6.20568e-05	0.000197215	0.00964764	5.58864e-05
Prevotella sp. oral taxon G71	2.36591e-05	8.99586e-05	7.14318e-05	0.00020109	0.0260377	4.77727e-05
Mogibacterium neglectum	4.06364e-05	8.41104e-05	8.63295e-05	0.000179368	0.0336996	4.56932e-05
Clostridiales[G] sp. oral taxon F89	1.29659e-05	6.70442e-05	5.51477e-05	0.000179666	0.0137202	4.21818e-05
TM7[G-3] sp. oral taxon 351	0.000129398	0.000756298	0.0001685	0.000384152	0.0291236	3.91023e-05
TM7[G-1] sp. oral taxon 346	0.00303295	0.0107722	0.00307174	0.00516461	0.0159814	3.87841e-05
Campylobacter sp. oral taxon C92	6.04545e-05	0.000144722	9.69318e-05	0.000156006	0.0279247	3.64773e-05
Prevotella sp. oral taxon 315	0.000146091	0.000481397	0.000180568	0.000387114	0.0080487	3.44773e-05
Eubacterium[11][G-1] sulci	2.80227e-05	0.000103243	5.92841e-05	0.000119658	0.0275843	3.12614e-05
Lachnospiraceae[G-5] sp. oral taxon 080	7.16932e-05	0.000249248	0.000100602	0.000217623	0.0038236	2.89091e-05
Selenomonas sp. oral taxon C23	7.89205e-05	0.000200951	9.89432e-05	0.000154747	0.0480627	2.00227e-05
Prevotella pallens	0.000585352	0.00284377	0.00059958	0.00187542	0.0325096	1.42273e-05
Treponema sp. oral taxon G76	9.43182e-07	7.75095e-06	1.36591e-05	5.77101e-05	0.0424319	1.27159e-05
Listeria monocytogenes	2.71932e-05	8.4025e-05	1.49205e-05	0.000105855	0.0206603	-1.22727e-05
Actinomyces naeslundiiII	0.000175534	0.00032587	0.000127375	0.000393619	0.0159131	-4.81591e-05
Selenomonas flueggei	0.000392205	0.00137499	0.000322023	0.00063241	0.0139018	-7.01818e-05
Streptococcus sp. oral taxon 058	0.000115182	0.00043531	3.49091e-05	9.31137e-05	0.014095	-8.02727e-05
Olsenella uli	0.00140476	0.00725584	0.001291	0.00293203	0.000907469	-0.000113761
Eikenella sp. oral taxon 011	0.000280034	0.00103833	0.000141966	0.000814548	0.0260611	-0.000138068
Streptococcus sp. oral taxon 055	0.000374125	0.000560817	0.000230386	0.000348384	0.0451661	-0.000143739
Streptococcus sp. oral taxon 064	0.000360591	0.000497727	0.000194807	0.000345516	0.00800718	-0.000165784
Leptotrichia sp. oral taxon 217	0.000297057	0.00112042	0.000121136	0.000672048	0.0481663	-0.00017592
Haemophilus sp. oral taxon C82	0.000232045	0.00181328	3.7375e-05	0.00025968	0.0143024	-0.00019467
Streptococcus pneumoniae	0.00061117	0.00104979	0.000377318	0.000669173	0.0263977	-0.000233852
Neisseria sp. oral taxon 009	0.000443239	0.00146008	0.00017308	0.000619269	0.0111946	-0.000270159
Gemella morbillorum	0.00183803	0.0036994	0.0015516	0.00409921	0.0191106	-0.000286432
Enterococcus sp. oral taxon A78	0.000679386	0.00127956	0.000362045	0.000560098	0.0480627	-0.000317341
Simonsiella muelleri	0.000480989	0.00174352	0.000122375	0.000535088	0.0236292	-0.000358614
Streptococcus pyogenes	0.00078717	0.00139886	0.000415852	0.000704386	0.0343735	-0.000371318
Leptotrichia sp. oral taxon 392	0.000795	0.00201813	0.000415659	0.00195426	0.0200018	-0.000379341
Granulicatella elegans	0.00076092	0.00146068	0.000313057	0.000547354	0.00823872	-0.000447864
Kingella denitrificans	0.00101485	0.00312323	0.000476716	0.002159	0.0250674	-0.000538136
Actinomyces sp. oral taxon 525	0.00169636	0.00355771	0.00106518	0.00156284	0.00233127	-0.000631182
Aggregatibacter sp. oral taxon 458	0.00149342	0.0036039	0.000834068	0.00256922	0.00686846	-0.000659352
Streptococcus sp. oral taxon 074	0.00163939	0.00354751	0.000909557	0.00201612	0.00800718	-0.00072983
Eikenella corrodens	0.00151337	0.00357513	0.000721205	0.00158547	0.0469764	-0.00079217
Mycobacterium neoaurum	0.000921318	0.00500575	3.11136e-05	0.000107408	0.000220202	-0.000890205
Streptococcus infantis	0.00473662	0.00971749	0.00370778	0.00754616	0.0143724	-0.00102884
Actinomyces massiliensis	0.00202273	0.00507296	0.000983386	0.00282188	0.0250674	-0.00103934
Neisseria mucosa	0.00156201	0.00830913	0.000512773	0.00340376	0.0368642	-0.00104924
Bergeyella sp. oral taxon 322	0.00165836	0.00323827	0.000577091	0.00117094	0.00027201	-0.00108127
Actinomyces sp. oral taxon 169	0.0019068	0.00439861	0.000735534	0.0019126	0.00349253	-0.00117126
Actinomyces odontolyticus	0.00848866	0.0148094	0.0073119	0.0130042	0.027692	-0.00117676
Streptococcus sp. oral taxon B66	0.0017821	0.00302968	0.000600693	0.000941675	0.00215401	-0.00118141
Neisseria elongata	0.00377891	0.0152804	0.00255448	0.0171088	0.00349253	-0.00122443
Corynebacterium durum	0.00185276	0.00819271	0.000307727	0.00101521	0.0118938	-0.00154503
Cardiobacterium hominis	0.00243559	0.0073595	0.000736977	0.00269928	0.0495841	-0.00169861
Lautropia mirabilis	0.00187305	0.0106928	8.53523e-05	0.000179371	0.0313595	-0.00178769
Veillonella atypica	0.00472865	0.00791387	0.00277844	0.00623339	0.00464891	-0.0019502
Neisseria sicca	0.00256268	0.00922776	0.000454466	0.00158399	0.0141469	-0.00210822
Kingella oralis	0.00305276	0.0098318	0.000876352	0.00215198	0.00276725	-0.00217641
Actinomyces sp. oral taxon 177	0.00321718	0.0111136	0.000774705	0.00181574	0.00197444	-0.00244248
Streptococcus sp. oral taxon 071	0.00794284	0.0199293	0.00487133	0.0128679	0.0256935	-0.00307151
Neisseria pharyngis	0.00513877	0.0170375	0.00128549	0.00740756	0.0021055	-0.00385328
Leptotrichia sp. oral taxon 213	0.00672575	0.017881	0.00246399	0.00709706	0.0226316	-0.00426176
Granulicatella sp. oral taxon B44	0.00804866	0.0121466	0.00370303	0.0055796	0.00609777	-0.00434563
Actinomyces naeslundii	0.00741757	0.0144905	0.00298705	0.00550759	0.000542189	-0.00443052
Actinomyces sp. oral taxon 175	0.0108356	0.0130372	0.00626988	0.0108869	0.0038236	-0.00456577
Streptococcus gordonii	0.021108	0.029172	0.0143365	0.036612	0.00710117	-0.00677153
Rothia dentiocariosa	0.0166266	0.04232	0.0068879	0.0234521	0.0021055	-0.00973875
Veillonella dispar	0.0249801	0.0262105	0.0152167	0.020249	0.00657868	-0.00976344
Actinomyces sp. oral taxon 171	0.0241973	0.0418181	0.0094378	0.0128664	0.000777847	-0.0147595
Streptococcus oralis	0.0483255	0.0709548	0.0330816	0.0525905	0.0343735	-0.0152439
Veillonella parvula	0.036625	0.0450427	0.0196242	0.0218967	0.000790667	-0.0170008
Streptococcus sanguinis	0.0270367	0.046773	0.00708298	0.0102951	4.65183e-05	-0.0199537
SD_Shallow, standard deviation of shallow; SD_Deep, standard deviation of Deep; q-value, statistics by two-part model and a false discovery rate; Change, difference between Deep and Shallow.
